# Supplementary material for: Chagasic cardiomyopathy is marked by a unique signature of activated CD4+ T cells
Source: Springer Nature journal article supplement (doi:10.1186/s12967-022-03761-5), 2022-11-30

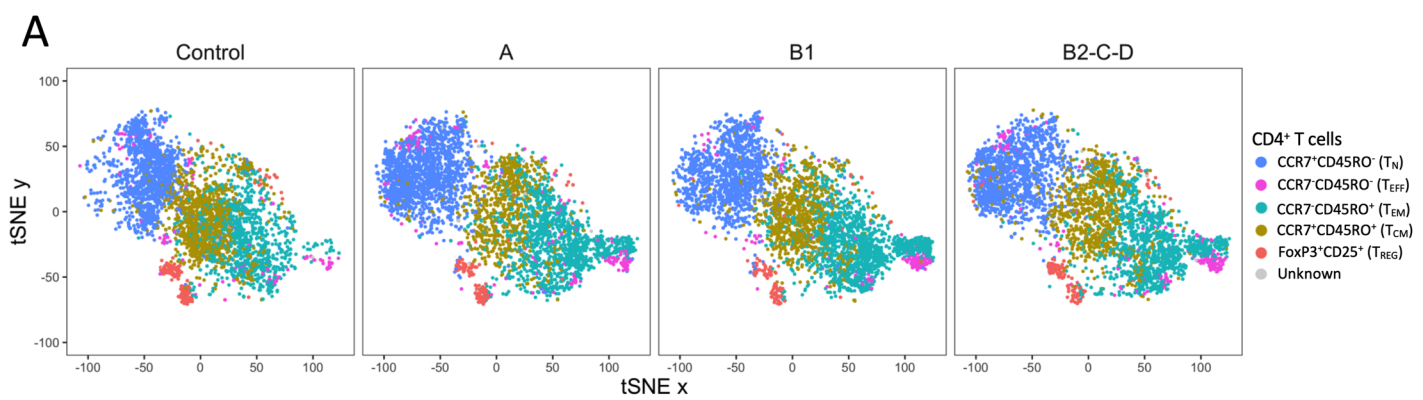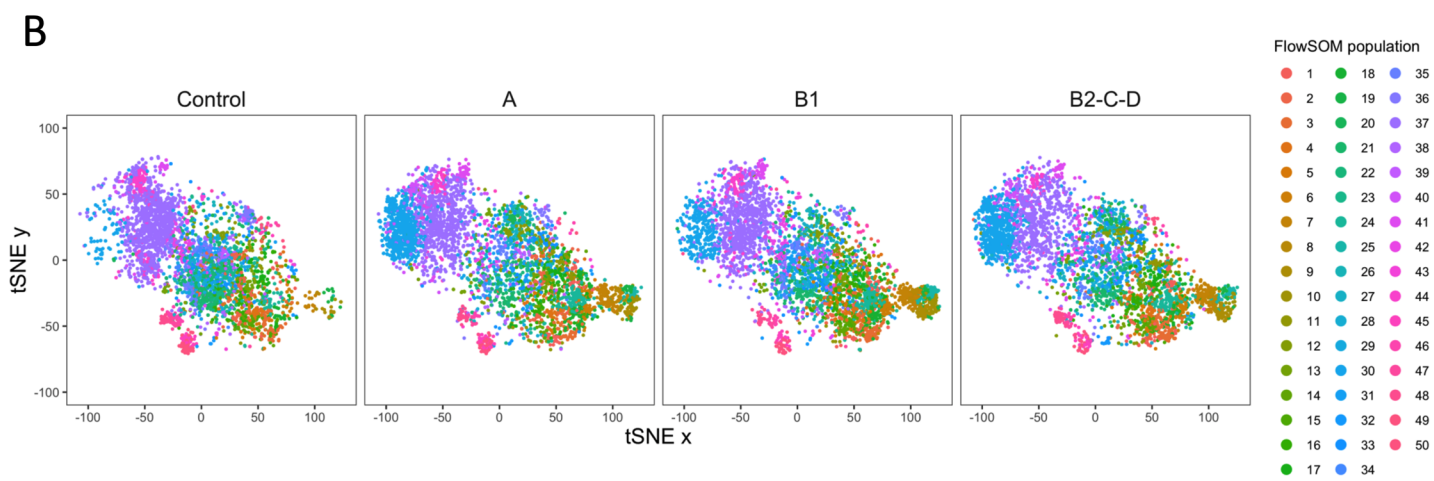

**C**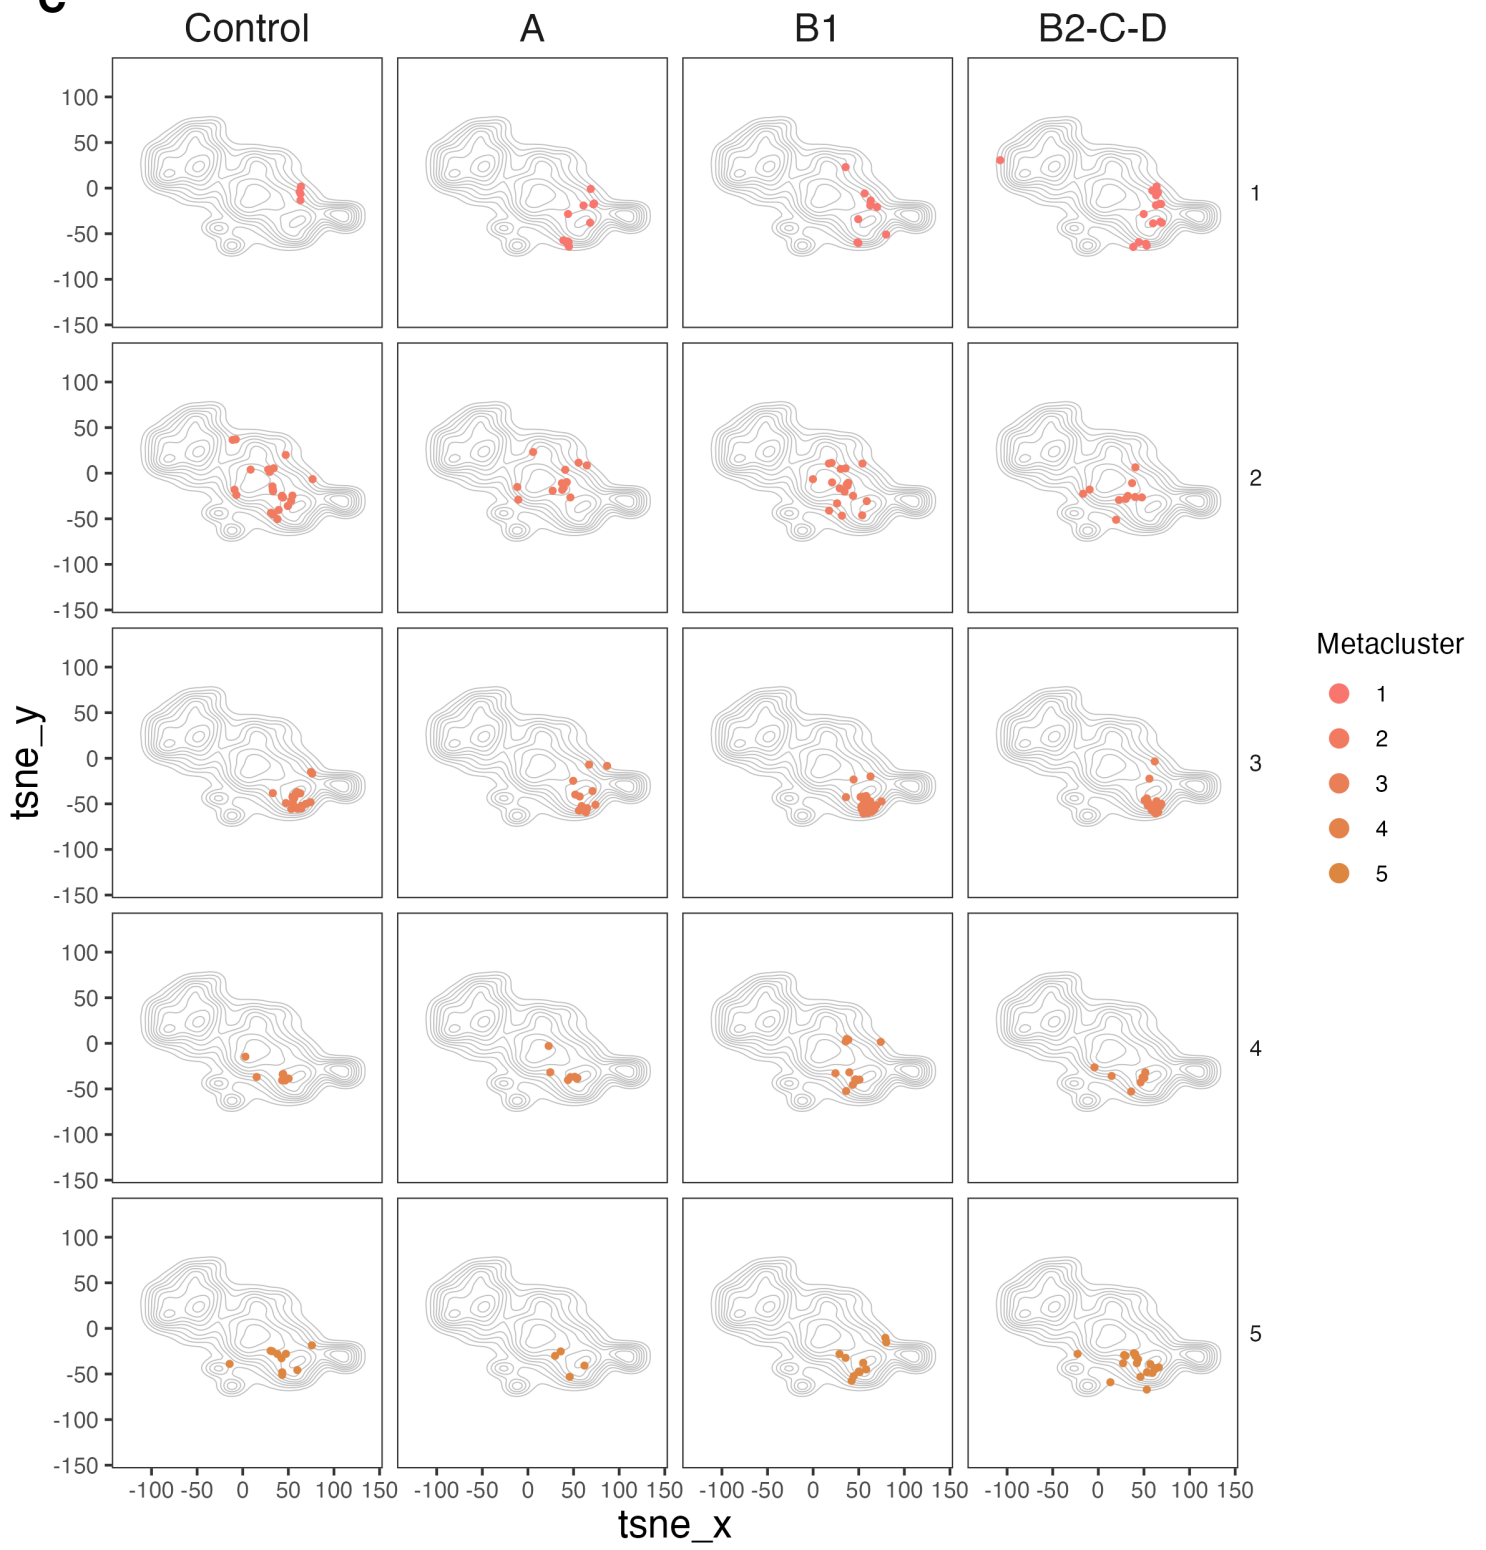

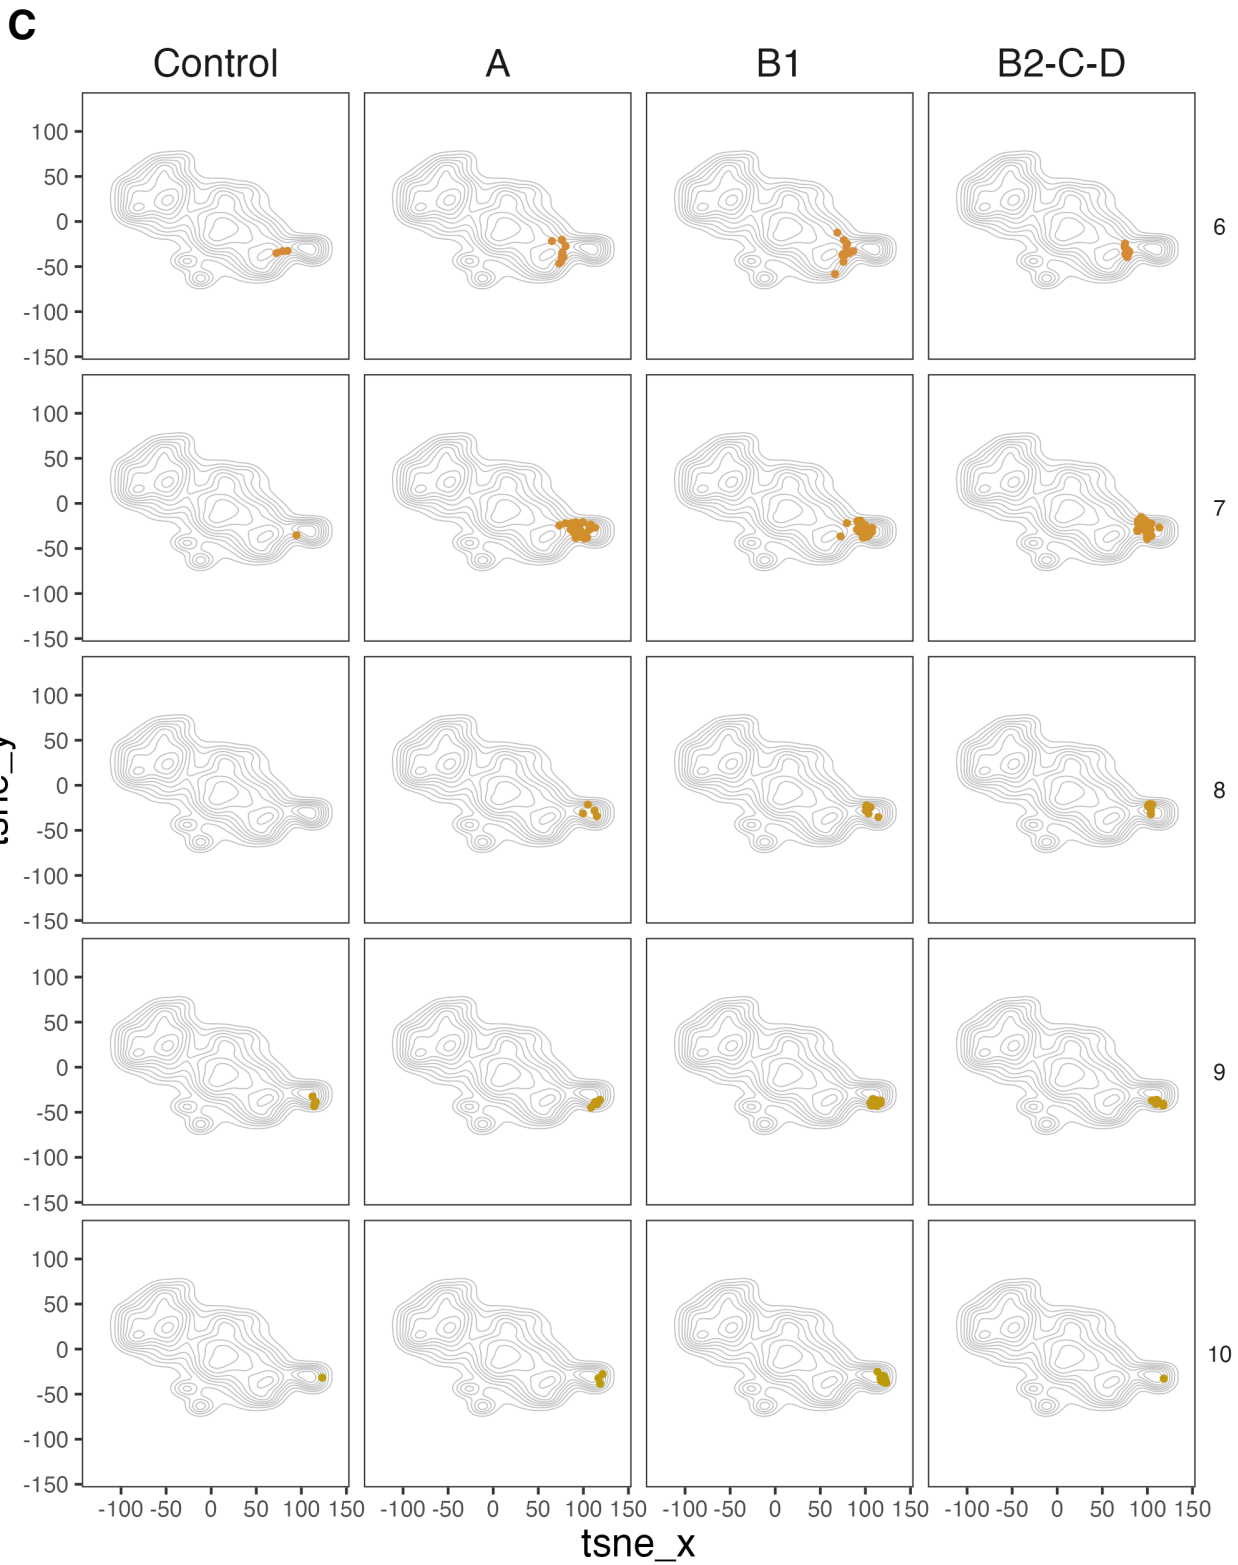

**C**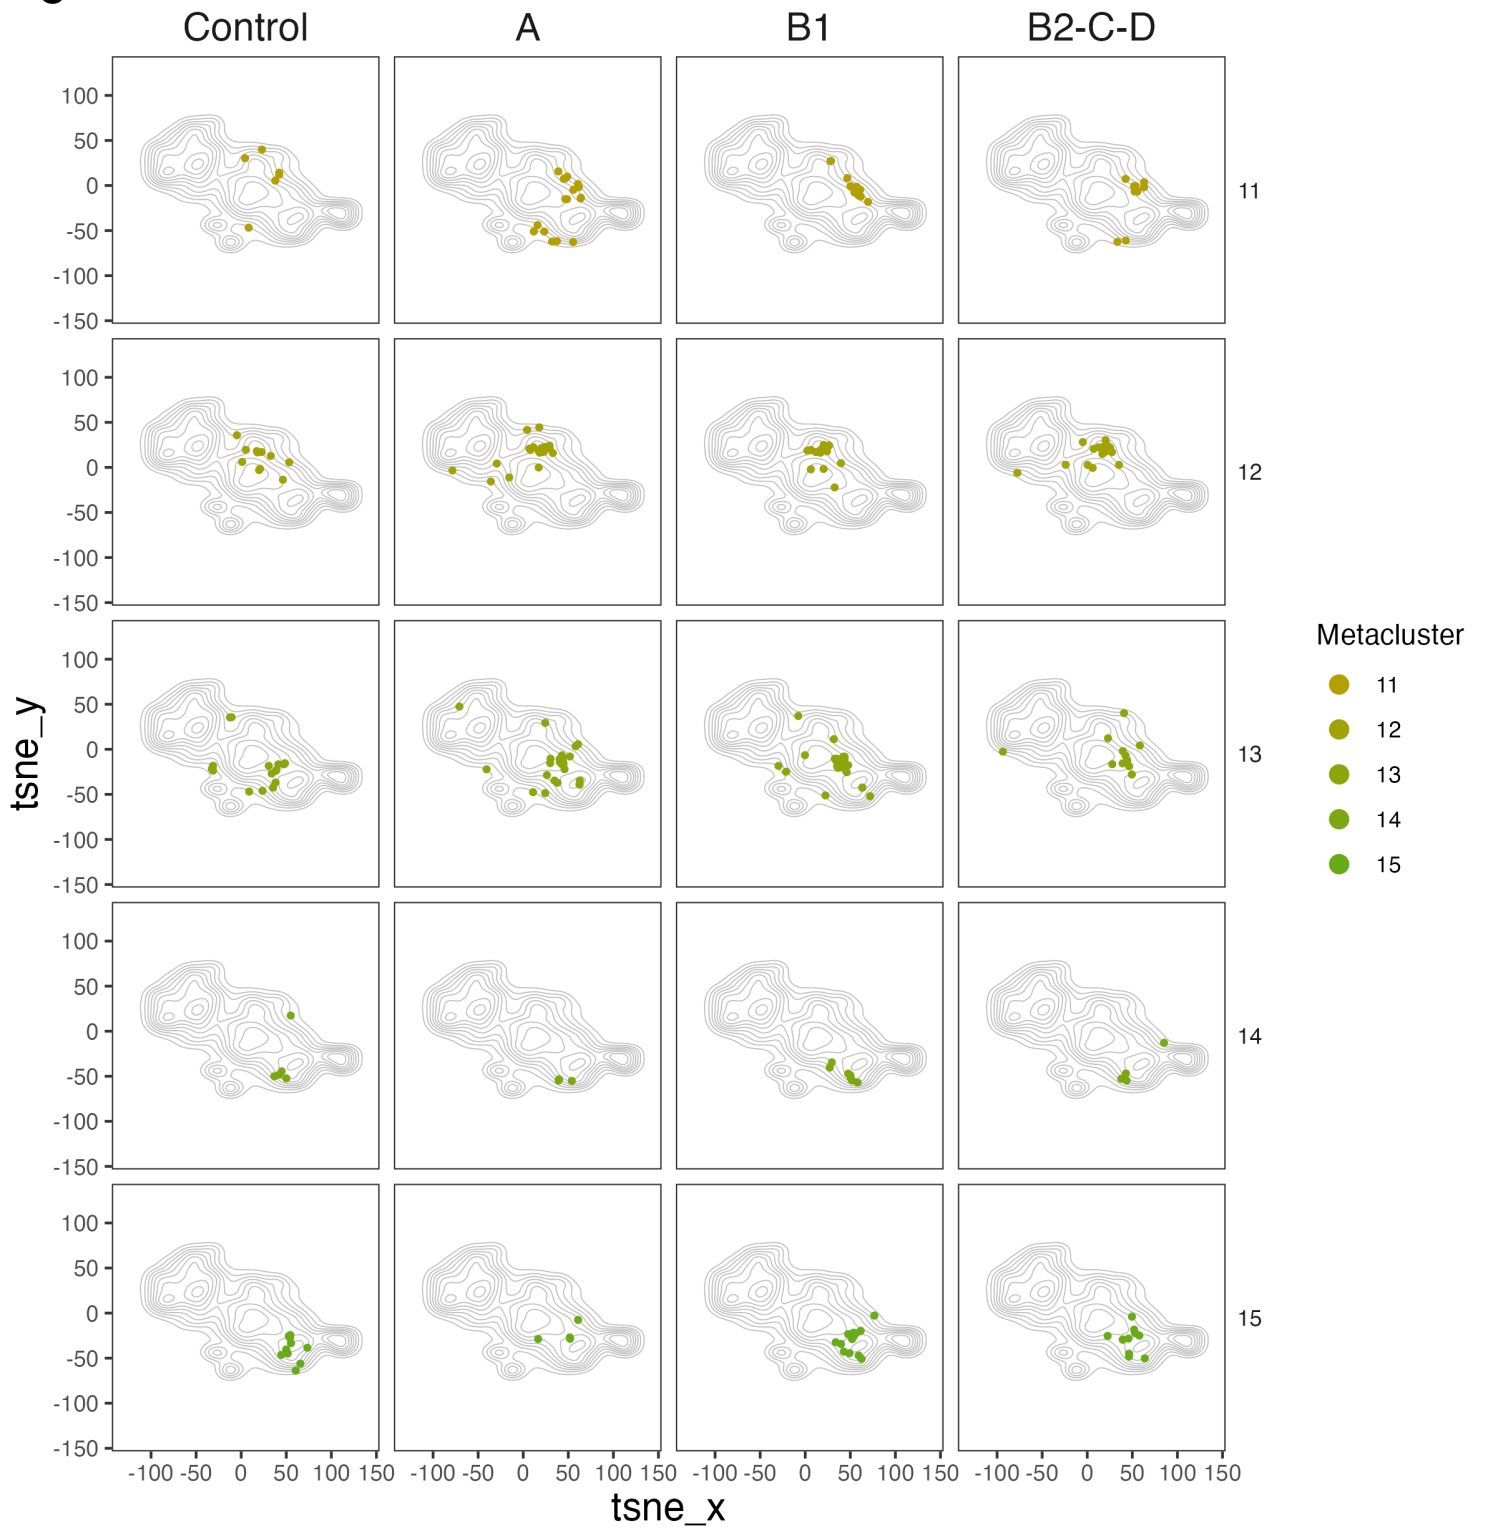

**C**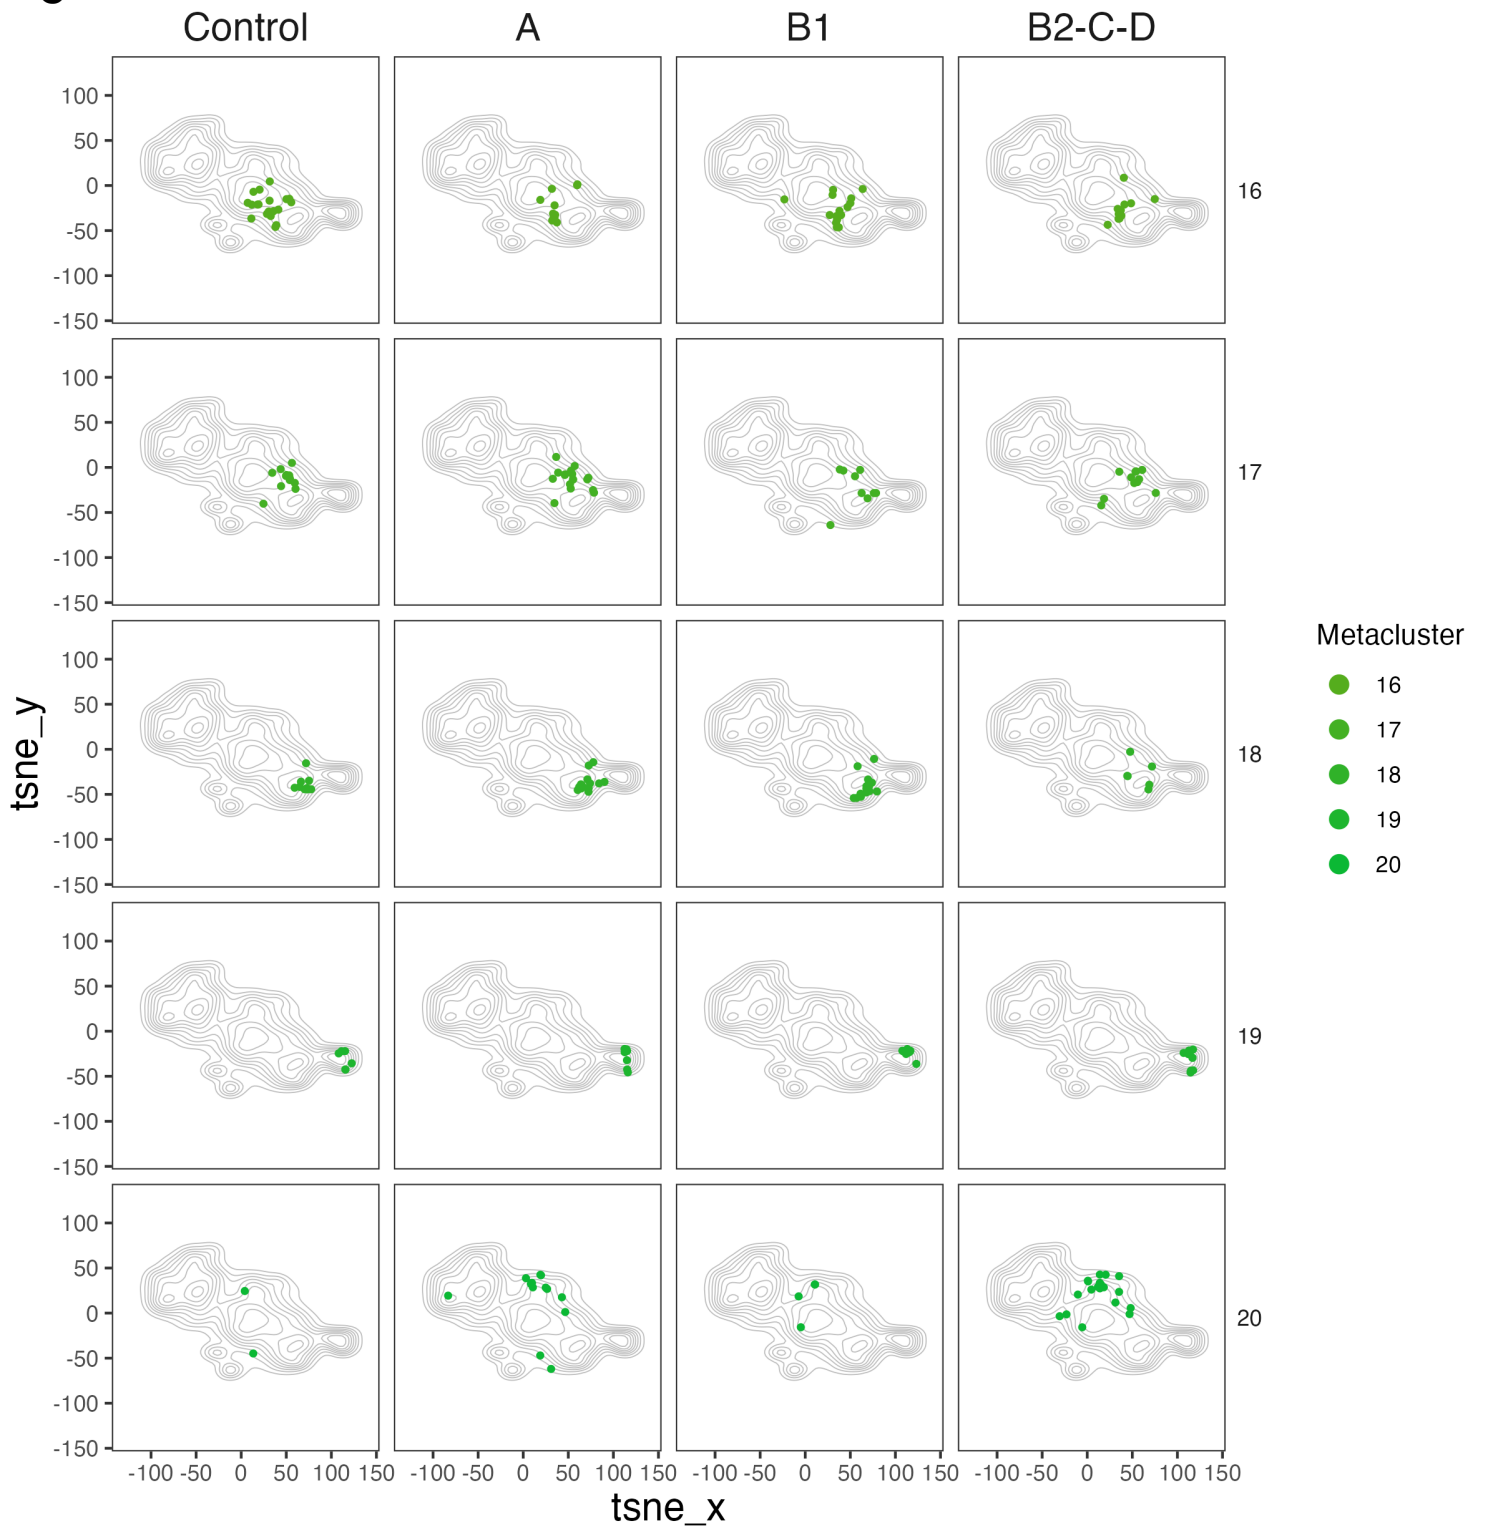

**C**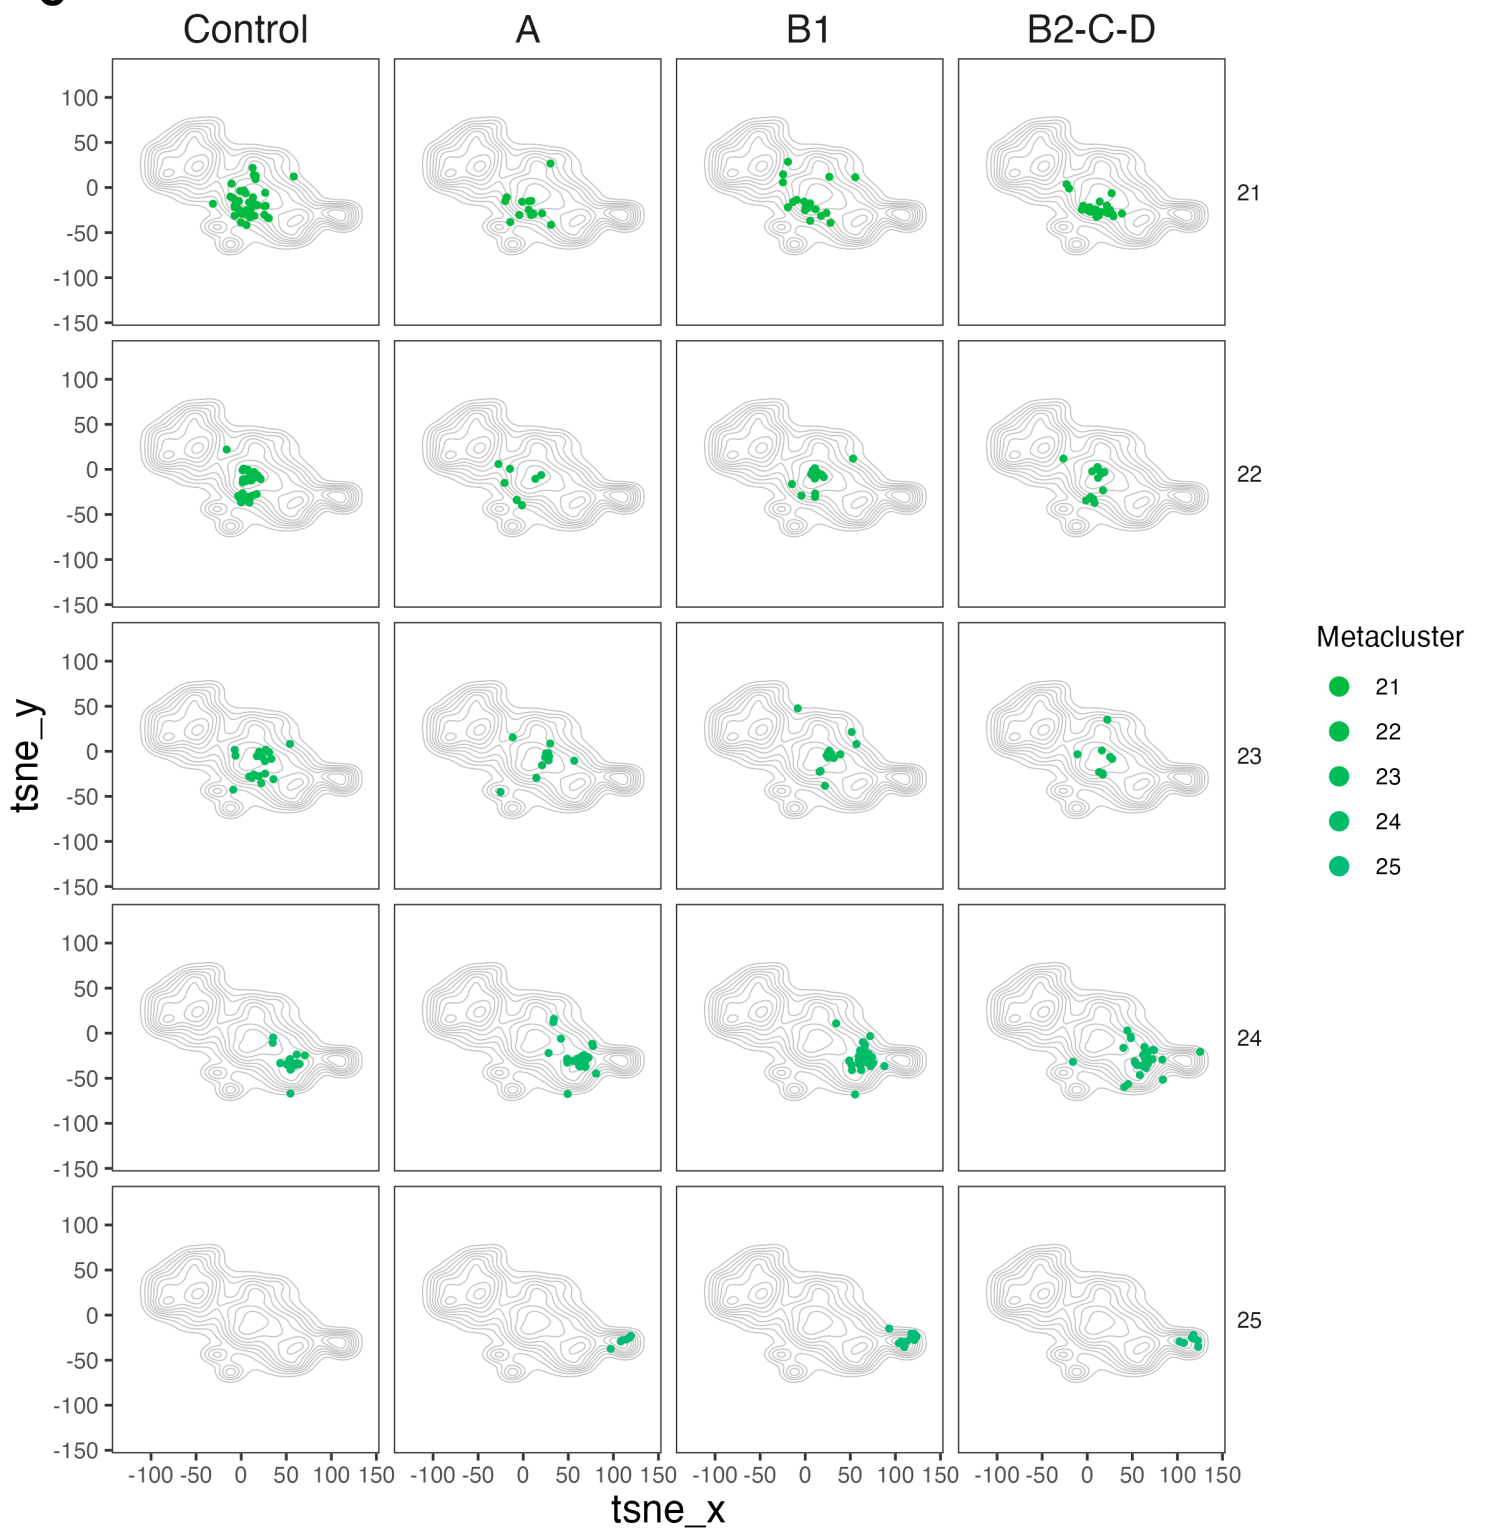

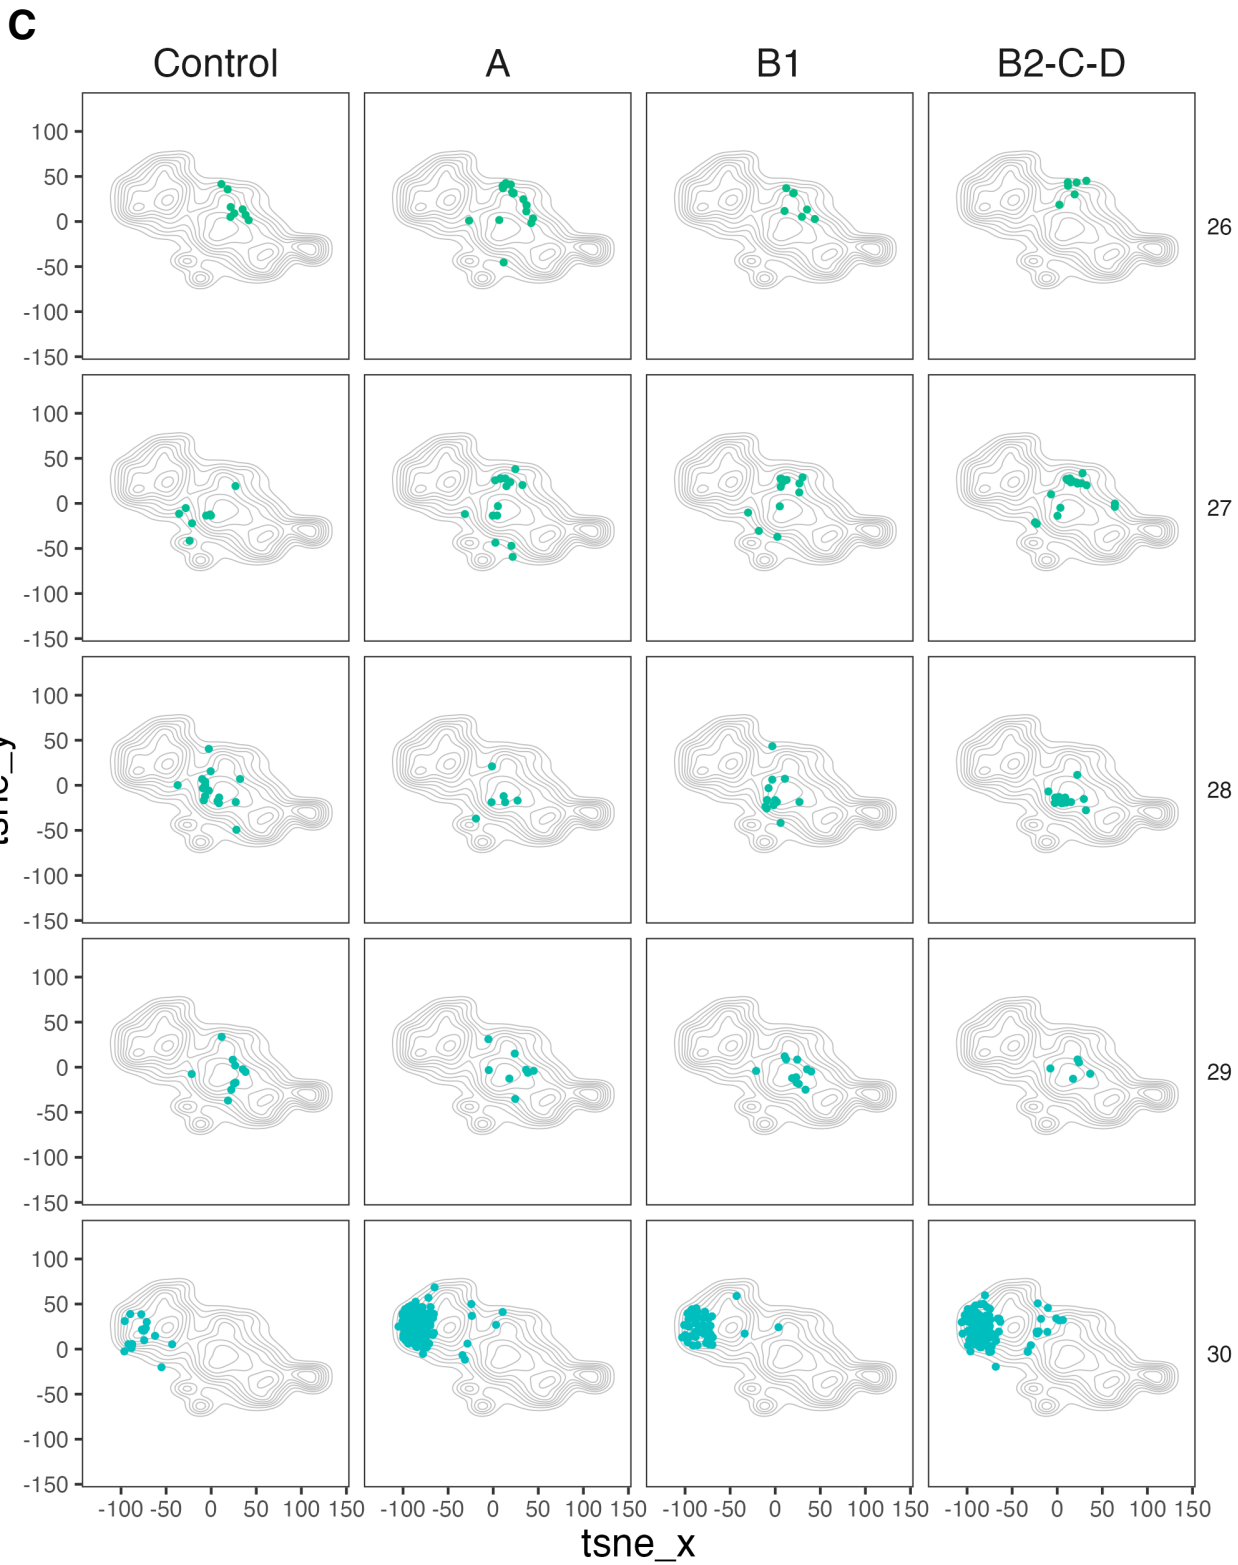

**C**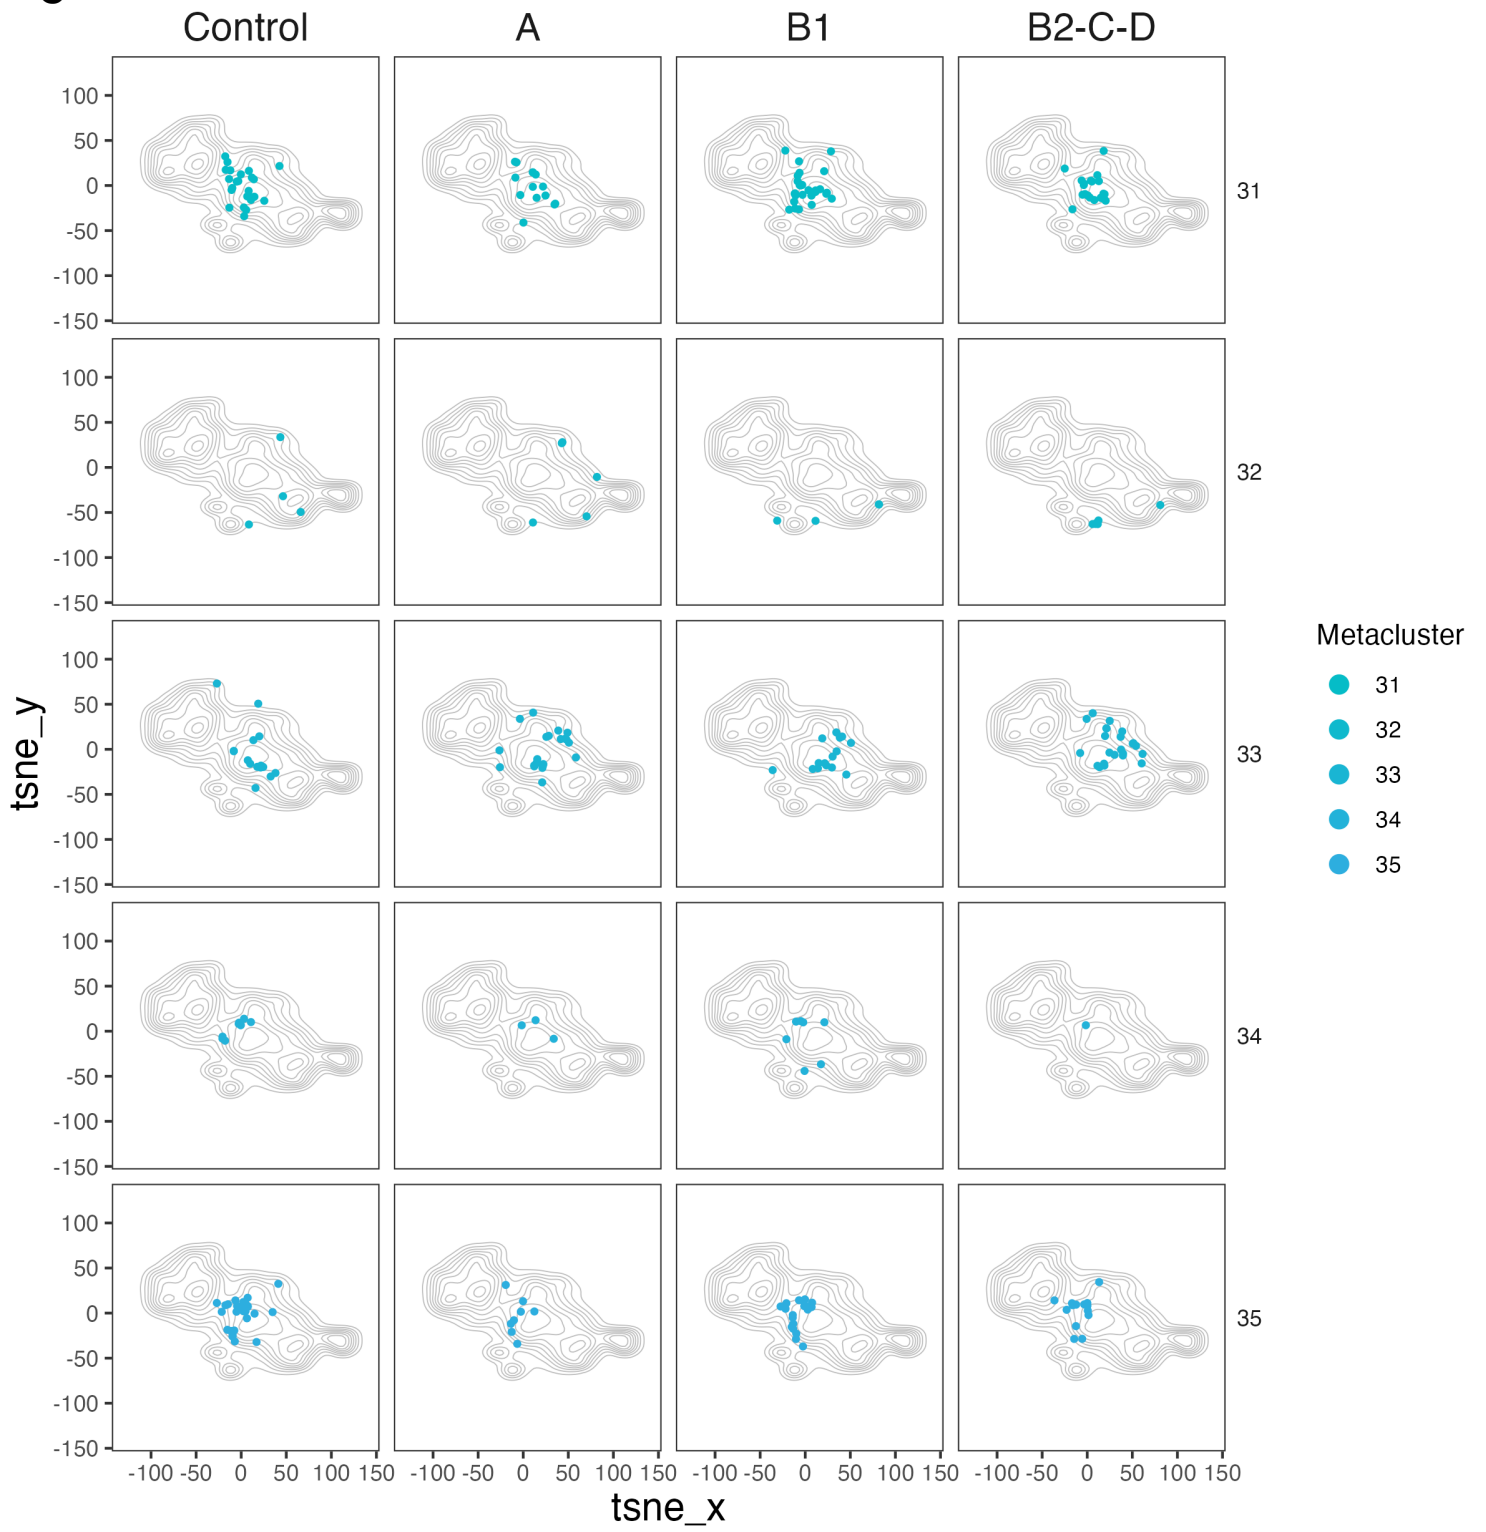



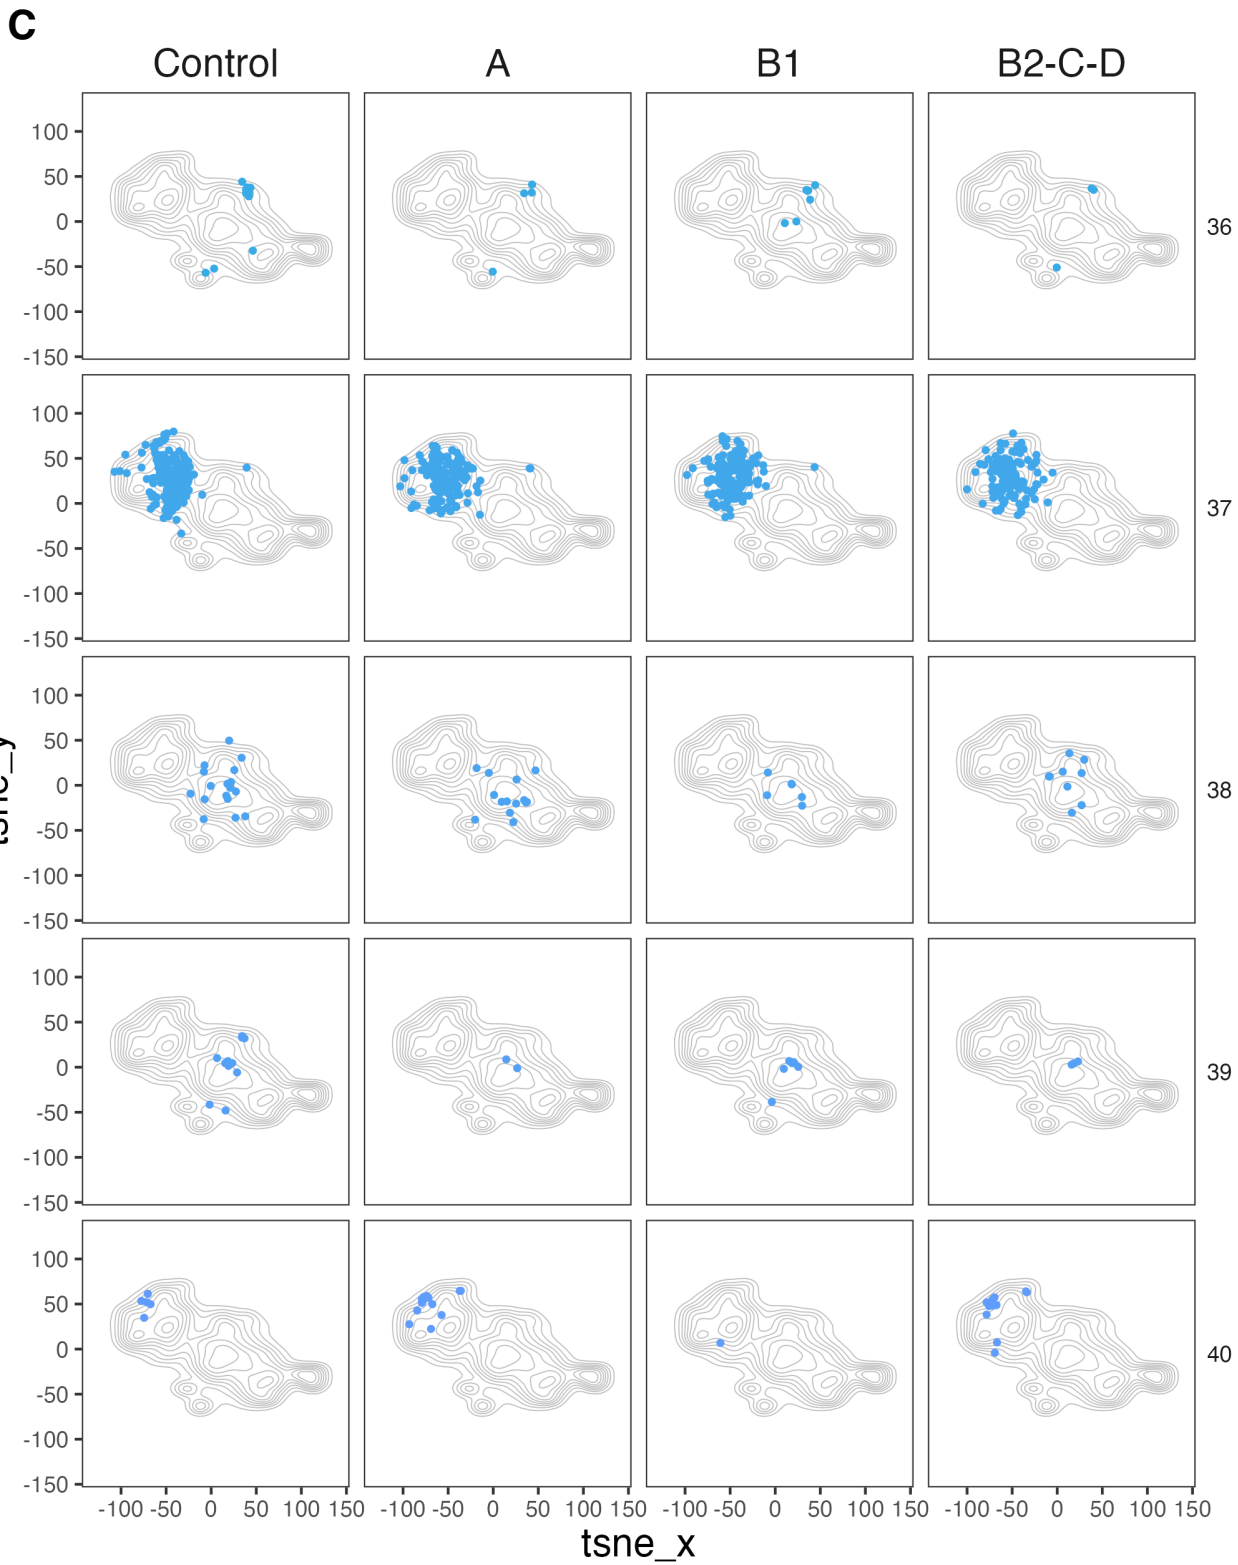

**C**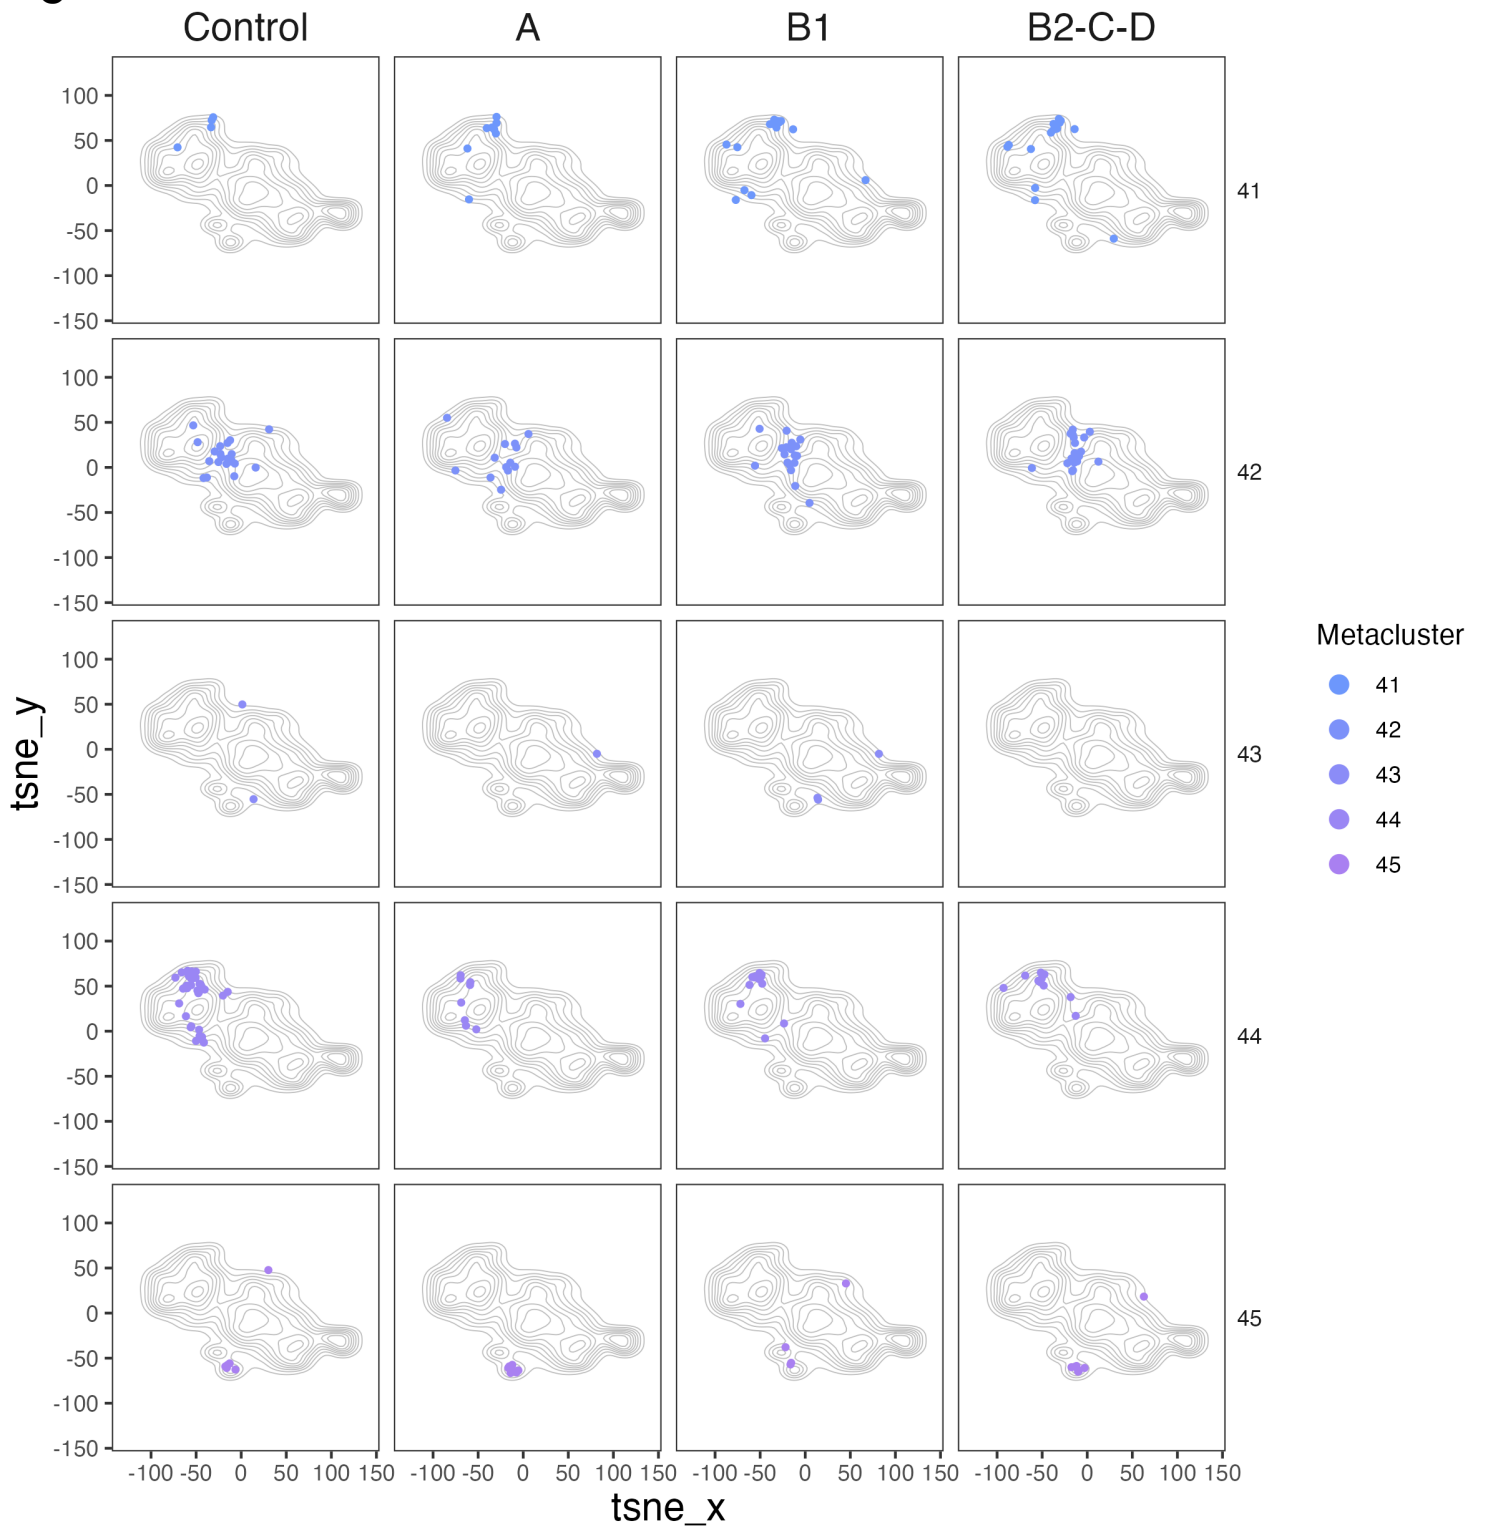

**C**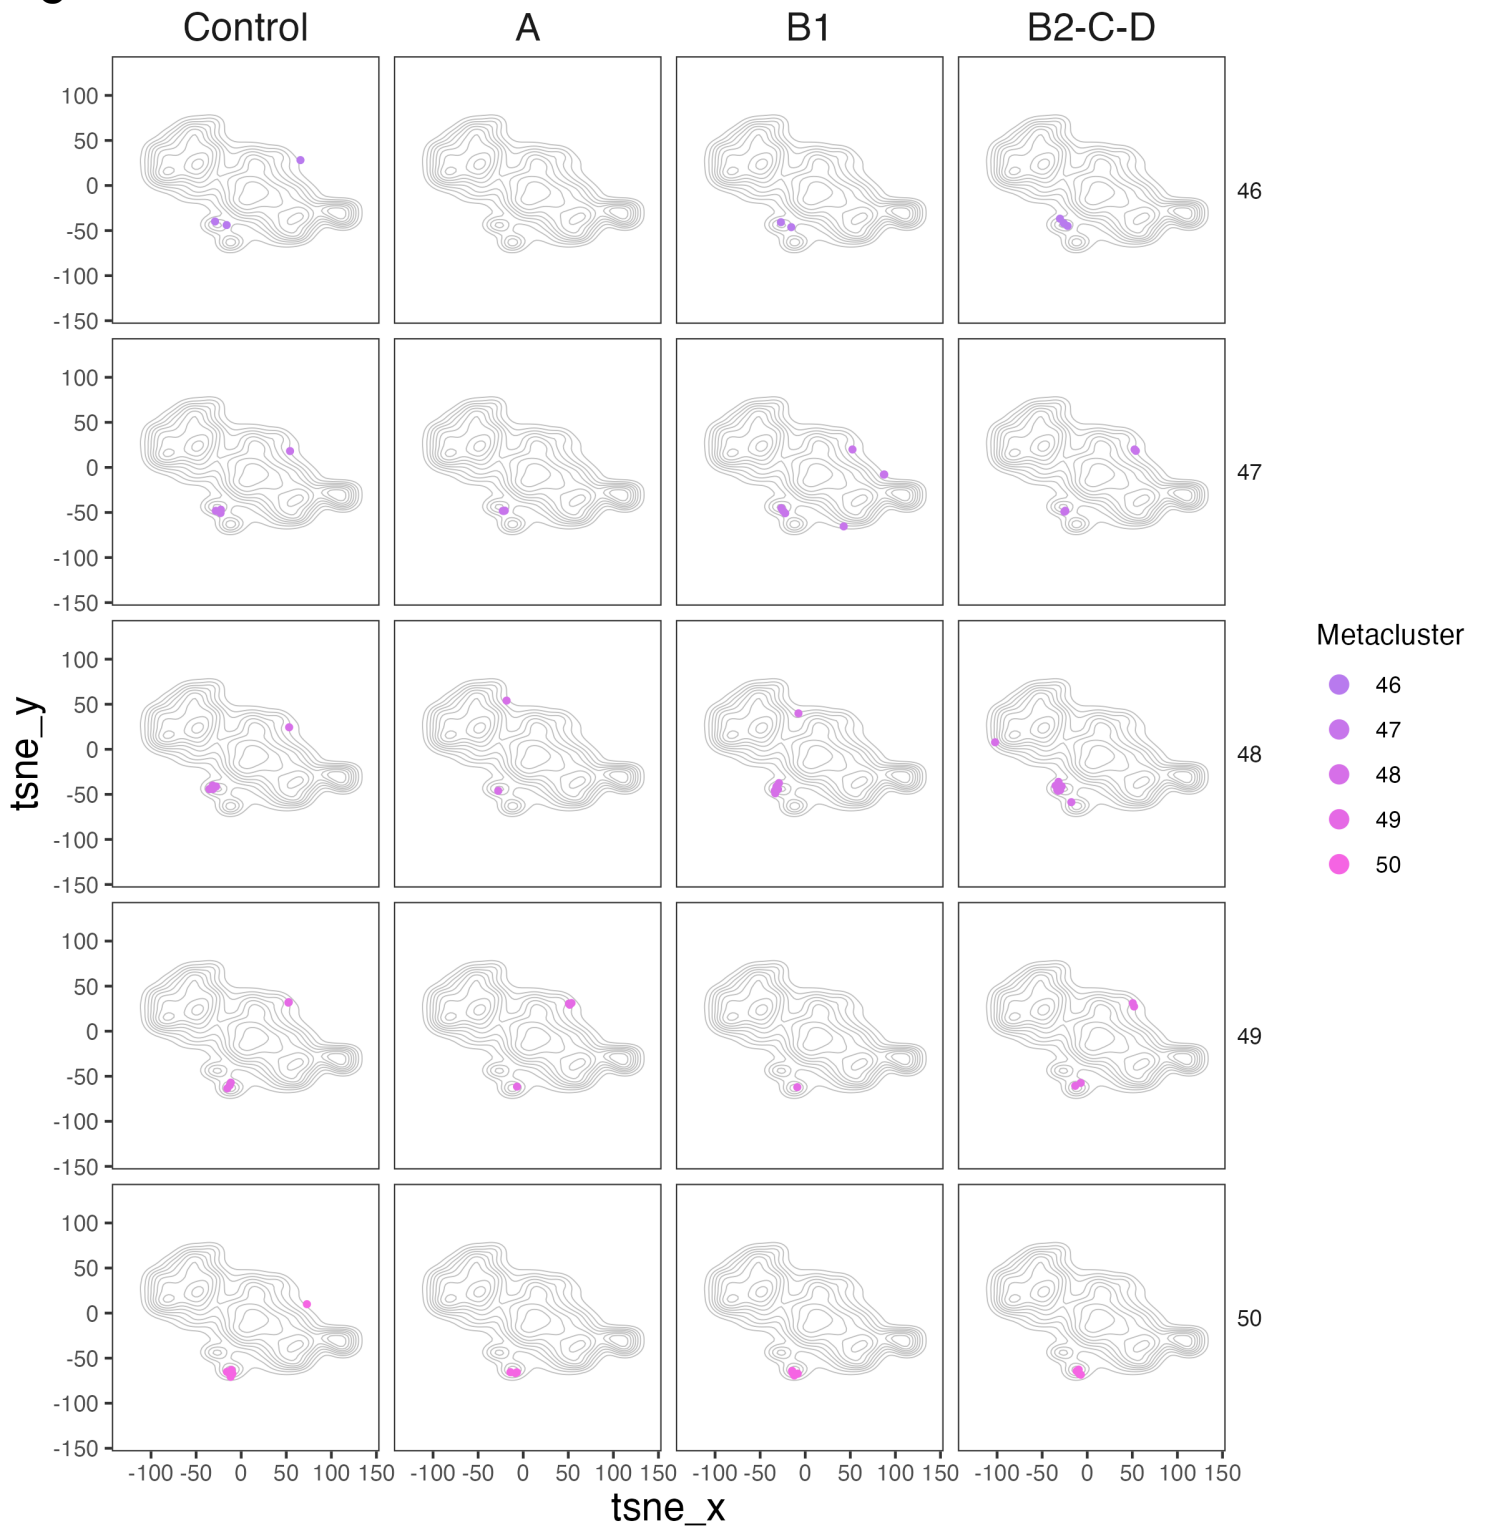

Supplement: MOESM1 [file 23772996]
