# Supplementary material for: Chagasic cardiomyopathy is marked by a unique signature of activated CD4+ T cells
Source: Springer Nature journal article supplement (doi:10.1186/s12967-022-03761-5), 2022-11-30
Supplement: MOESM5 [file 23772996]

|             | Indeterminate | Chagas cardiomyopathy |              | Controls    | P-value* |
|-------------|---------------|-----------------------|--------------|-------------|----------|
|             | A (n=8)       | B1 (n=9)              | B2/C/D (n=7) | (n = 14)    |          |
| Age, yr     | 54 ± 10.2     | 50 ± 15.2             | 52 ± 9.5     | 41.6 ± 16.4 | 0.3574   |
| Female/Male | 4/4           | 5/4                   | 2/5          | 5/8*        |          |
| LVEF (%)    | 68 ± 3.2      | 55.2 ± 15.0           | 38 ± 9.9     | -           | 0.0001   |
| LVEDD (mm)  | 45.6 ± 3.4    | 56.5 ± 8.1            | 67 ± 7.3     | -           | <0.0001  |

Table S1. Clinical and echocardiographic characteristics of the study population. Values are expressed as mean and standard deviation (mean ± SD) or absolute number. LVEF, left ventricular ejection fraction; LVEDD, left ventricular end-diastolic diameter. \*P=value for comparison between the groups (Kruskal-Wallis test). \*Missing data for 1 participant.
